# Supplementary material for: Methamphetamine Use and Schizophrenia: A Population-Based Cohort Study in California
Source: Atypon-hosted journal article supplement (doi:10.1176/appi.ajp.2011.10070937), 2011-12-30
Supplement: appi.ajp.2011.10070937_ds001.pdf [file appi.ajp.2011.10070937_ds001.pdf]

**TABLE S1. Cox Models With Propensity Score Matching Versus Traditional Cox Models With Covariate Adjustment for Estimating Risk of Schizophrenia Across Drug and Population Proxy Comparison Groups**

| Drug Group (Reference Group) <sup>a</sup> | Cox Models With Propensity Score Matching <sup>b</sup> |             |        | Cox Models With Covariate Adjustment <sup>b</sup> |             |        |
|-------------------------------------------|--------------------------------------------------------|-------------|--------|---------------------------------------------------|-------------|--------|
|                                           | Hazard Ratio                                           | 95% CI      | p      | Adjusted Hazard Ratio <sup>c</sup>                | 95% CI      | p      |
| Methamphetamine (appendicitis)            | 9.37                                                   | 6.59–13.32  | <0.001 | 17.63                                             | 14.00–22.19 | <0.001 |
| Methamphetamine (cocaine)                 | 1.46                                                   | 1.15–1.85   | <0.001 | 1.63                                              | 1.31–1.96   | <0.001 |
| Methamphetamine (opioids)                 | 2.81                                                   | 2.21–3.58   | <0.001 | 2.40                                              | 1.97–2.92   | <0.001 |
| Methamphetamine (alcohol)                 | 1.68                                                   | 1.41–1.99   | <0.001 | 1.39                                              | 1.23–1.58   | <0.001 |
| Methamphetamine (cannabis)                | 1.24                                                   | 0.98–1.56   | 0.073  | 1.18                                              | 0.97–1.44   | 0.104  |
| Cocaine (appendicitis)                    | 5.84                                                   | 3.99–8.55   | <0.001 | 10.11                                             | 7.89–12.96  | <0.001 |
| Opioids (appendicitis)                    | 3.60                                                   | 2.63–4.94   | <0.001 | 6.81                                              | 5.36–8.66   | <0.001 |
| Alcohol (appendicitis)                    | 5.56                                                   | 4.48–6.90   | <0.001 | 11.09                                             | 9.13–13.49  | <0.001 |
| Cannabis (appendicitis)                   | 8.16                                                   | 3.89–8.83   | <0.001 | 14.40                                             | 10.93–18.97 | <0.001 |
| Appendicitis (exclusion criteria)         | 1.23                                                   | 0.93–1.63   | 0.15   | 1.03 <sup>c</sup>                                 | 0.83–1.27   | <0.001 |
| Methamphetamine (exclusion criteria)      | 17.49                                                  | 11.15–27.45 | <0.001 | 20.35 <sup>c</sup>                                | 18.06–22.92 | <0.001 |
| Cocaine (exclusion criteria)              | 8.57                                                   | 6.20–11.84  | <0.001 | 10.46 <sup>c</sup>                                | 9.23–11.87  | <0.001 |
| Alcohol (exclusion criteria)              | 6.47                                                   | 5.75–7.29   | <0.001 | 9.61 <sup>c</sup>                                 | 9.06–10.20  | <0.001 |
| Opioids (exclusion criteria)              | 4.32                                                   | 5.19–5.86   | <0.001 | 7.23 <sup>c</sup>                                 | 6.23–8.39   | <0.001 |
| Cannabis (exclusion criteria)             | 13.56                                                  | 7.56–24.31  | <0.001 | 17.52 <sup>c</sup>                                | 14.91–20.59 | <0.001 |

<sup>a</sup> Cohorts were matched 1:1 on age, race, sex, time from index admission until the last date in the study file, Charlson comorbidity index score, California region of patient’s residence (Far North, Sacramento Metro, Sierras, Bay Area, San Joaquin Valley, Central Coast, Inland Empire, South Coast, and San Diego), and number of hospital admissions occurring from the index admission until the study end (or the occurrence of the first schizophrenia event). These estimates are taken from Tables 3 and 4 in the main text. The exclusion criteria group is described in the Method section.

<sup>b</sup> Final Cox models (using simultaneous variable entry method) adjusted for age, race, sex, time from index admission until the last date in the study file, Charlson comorbidity index score, California region of patient’s residence, and number of hospital admissions occurring from the index admission until the study end (or the occurrence of the first schizophrenia event).

<sup>c</sup> The sample sizes of the groups involved in this Cox analysis, along with the number of outcome schizophrenia events, are listed in Table 1 in the main text.
